# Supplementary material
Source: Springer Nature journal article supplement (https://www.springermedizin.de/resource/supplementary/12931_2013_1458_MOESM3_ESM.pdf/9426396)
Supplement: MOESM3 [file 9426396]

**a**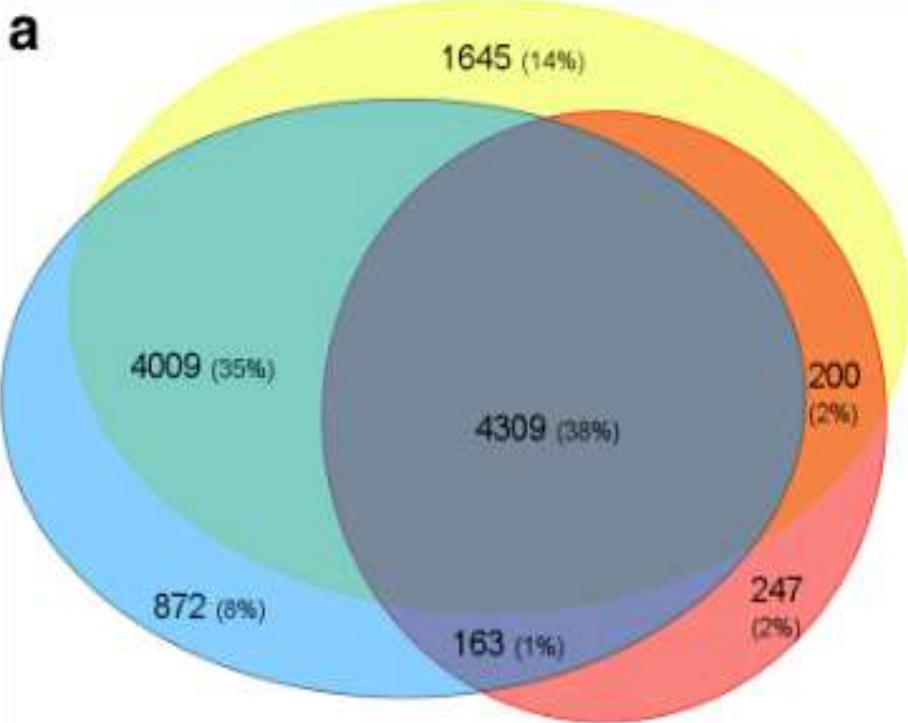 Healthy Allergic rhinitis Allergic rhinitis & asthma**b**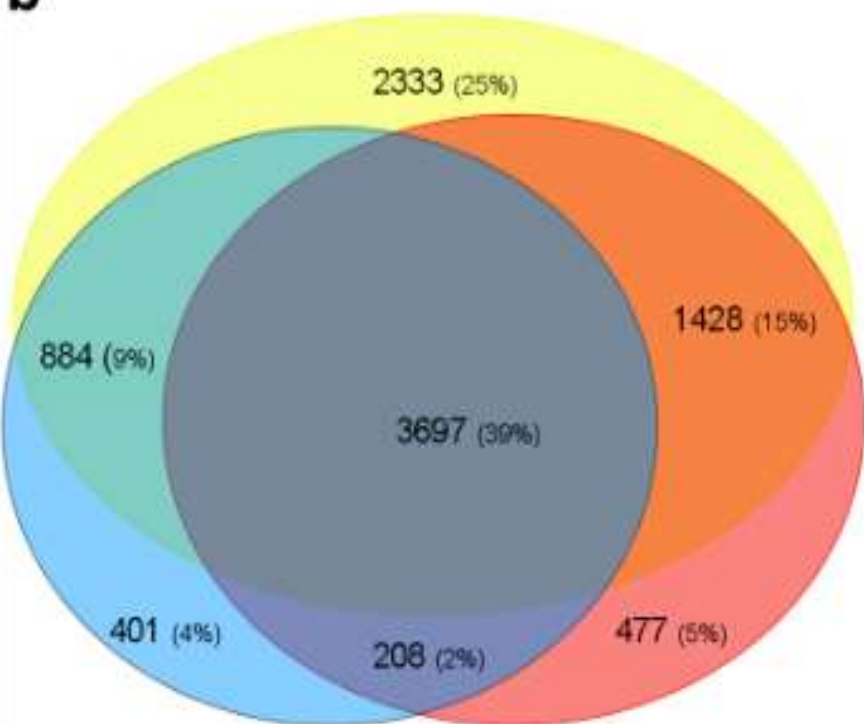 Healthy Allergic rhinitis Allergic rhinitis & asthma
